# Supplementary material
Source: MDPI journal article supplement (https://www.mdpi.com/2227-9717/9/6/1055)
Supplement: s1 [file s1]

## **Supplementary Materials:**

**Table S1.** BET surface area, mean pore diameter, and total pore volume of two samples.

| <b>Photocatalyst</b> | <b>BET surface area<br/>(m<sup>2</sup>·g<sup>-1</sup>)</b> | <b>Mean pore diameter<br/>(nm)</b> | <b>Total pore volume<br/>(cm<sup>3</sup>·g<sup>-1</sup>)</b> |
|----------------------|------------------------------------------------------------|------------------------------------|--------------------------------------------------------------|
| pCN                  | 15.3                                                       | 37.8                               | 0.10                                                         |
| D149/pCN             | 14.7                                                       | 23.5                               | 0.09                                                         |

**Table S2.** Comparison of H<sub>2</sub> evolution rate of dye-sensitized g-C<sub>3</sub>N<sub>4</sub> under visible light irradiation.

| Catalyst                                       | Light    | Co-catalyst | Electron donor | H <sub>2</sub> Rate<br>( $\mu\text{mol}\cdot\text{h}^{-1}\cdot\text{g}^{-1}$ ) | References |
|------------------------------------------------|----------|-------------|----------------|--------------------------------------------------------------------------------|------------|
| N3/g-C <sub>3</sub> N <sub>4</sub>             | Xe 300 W | Pt          | TEOA           | 1490.7                                                                         | [31]       |
| N719/g-C <sub>3</sub> N <sub>4</sub>           | Xe 300 W | Pt          | TEOA           | 2500.1                                                                         | [31]       |
| PY-1/g-C <sub>3</sub> N <sub>4</sub>           | Xe 300 W | Pt          | AA             | 5508.1                                                                         | [37]       |
| Chlorin e6/g-C <sub>3</sub> N <sub>4</sub>     | Xe 300 W | Pt          | TEOA           | 1275.6                                                                         | [39]       |
| Protoporphyrin/g-C <sub>3</sub> N <sub>4</sub> | Xe 300 W | Pt          | TEOA           | 1153.8                                                                         | [40]       |
| mTHPC/g-C <sub>3</sub> N <sub>4</sub>          | Xe 300 W | Pt          | TEOA           | 1041.4                                                                         | [41]       |
| Ppa/g-C <sub>3</sub> N <sub>4</sub>            | Xe 300 W | Pt          | TEOA           | 1093.0                                                                         | [42]       |
| Eosin Y/g-C <sub>3</sub> N <sub>4</sub>        | Xe 300 W | Pt          | TEOA           | 1810.0                                                                         | [27]       |
| MgPc/g-C <sub>3</sub> N <sub>4</sub>           | Xe 300 W | Pt          | TEOA           | 39.0                                                                           | [79]       |
| ErB/g-C <sub>3</sub> N <sub>4</sub>            | Xe 300 W | Pt          | TEOA           | 6525.0                                                                         | [80]       |
| Eosin Y/g-C <sub>3</sub> N <sub>4</sub>        | Xe 300 W | Pt          | TEOA           | 3850.0                                                                         | [81]       |
| D149/g-C <sub>3</sub> N <sub>4</sub>           | Xe 300 W | Pt          | TEOA           | 2138.2                                                                         | This work  |

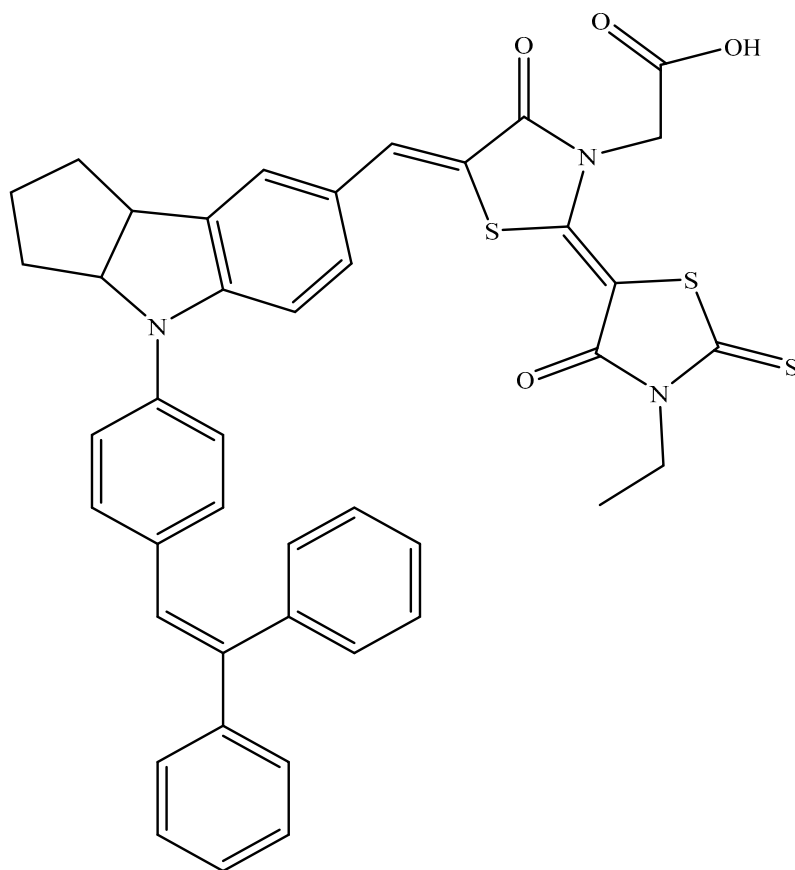

**Figure S1.** Chemical structures of D149 dye.

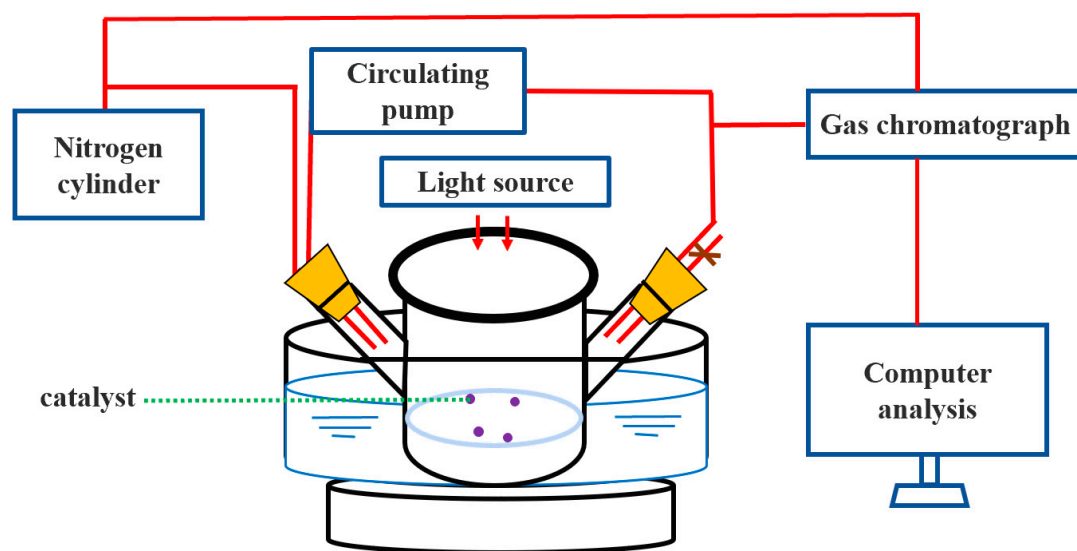

**Figure S2.** The schematic hydrogen production system.

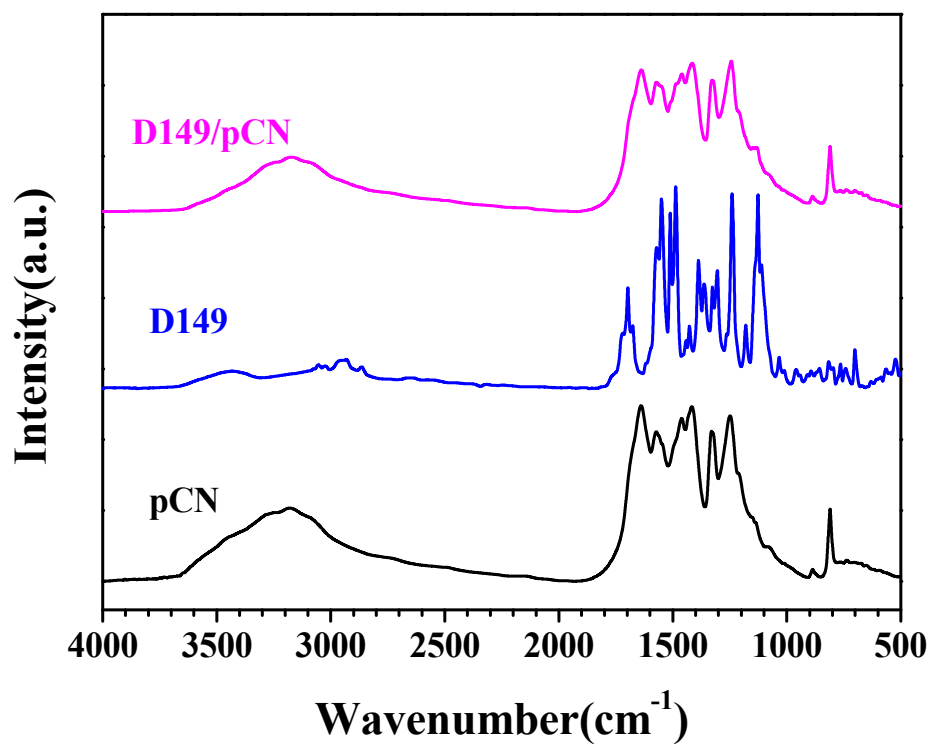

**Figure S3.** FT-IR spectra of pCN, D149, and D149/pCN.

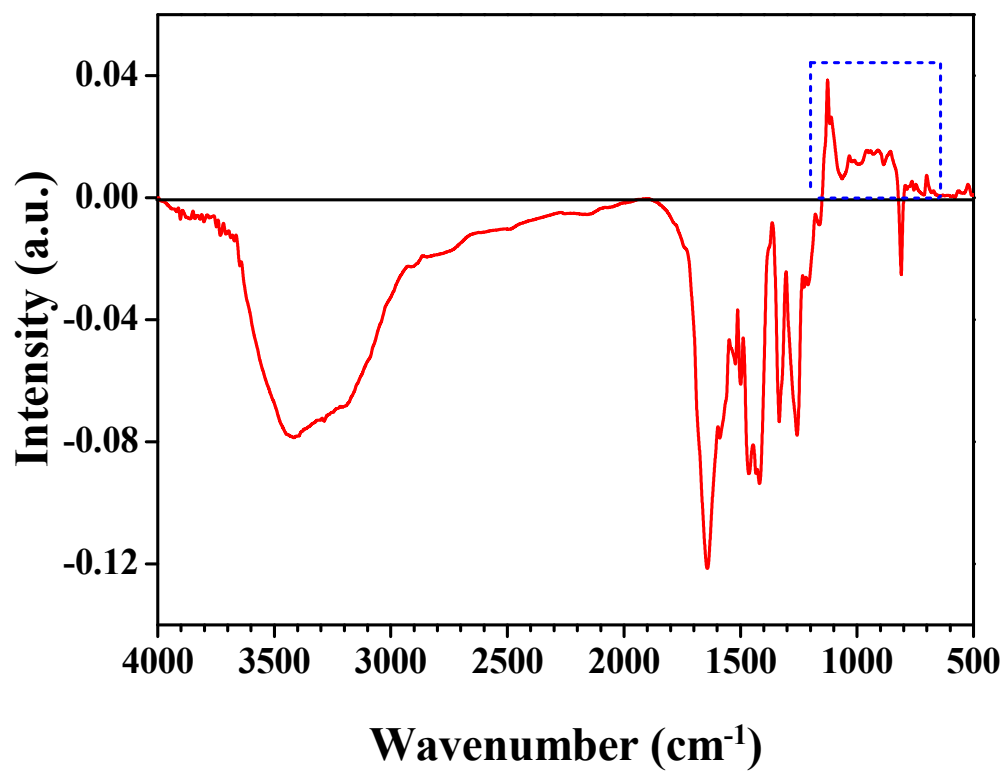

**Figure S4.** The differential spectra obtained by subtracting the spectrum of pCN from D149/pCN.

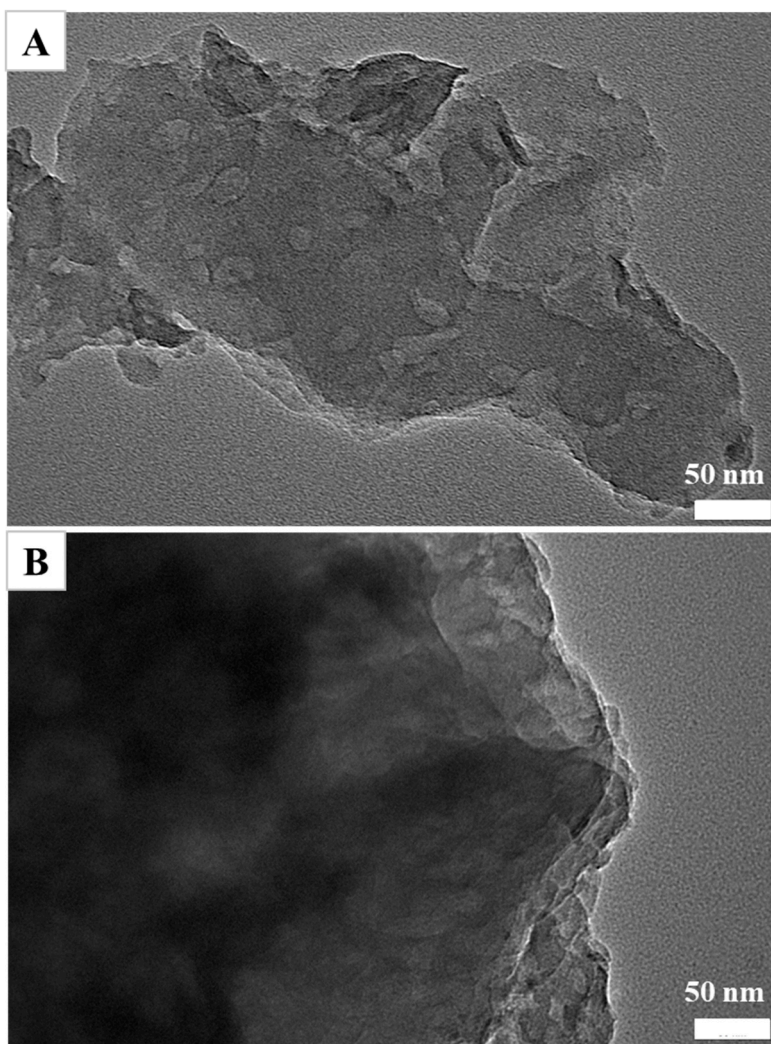

**Figure S5.** TEM images of pCN (A) and D149/pCN (B).

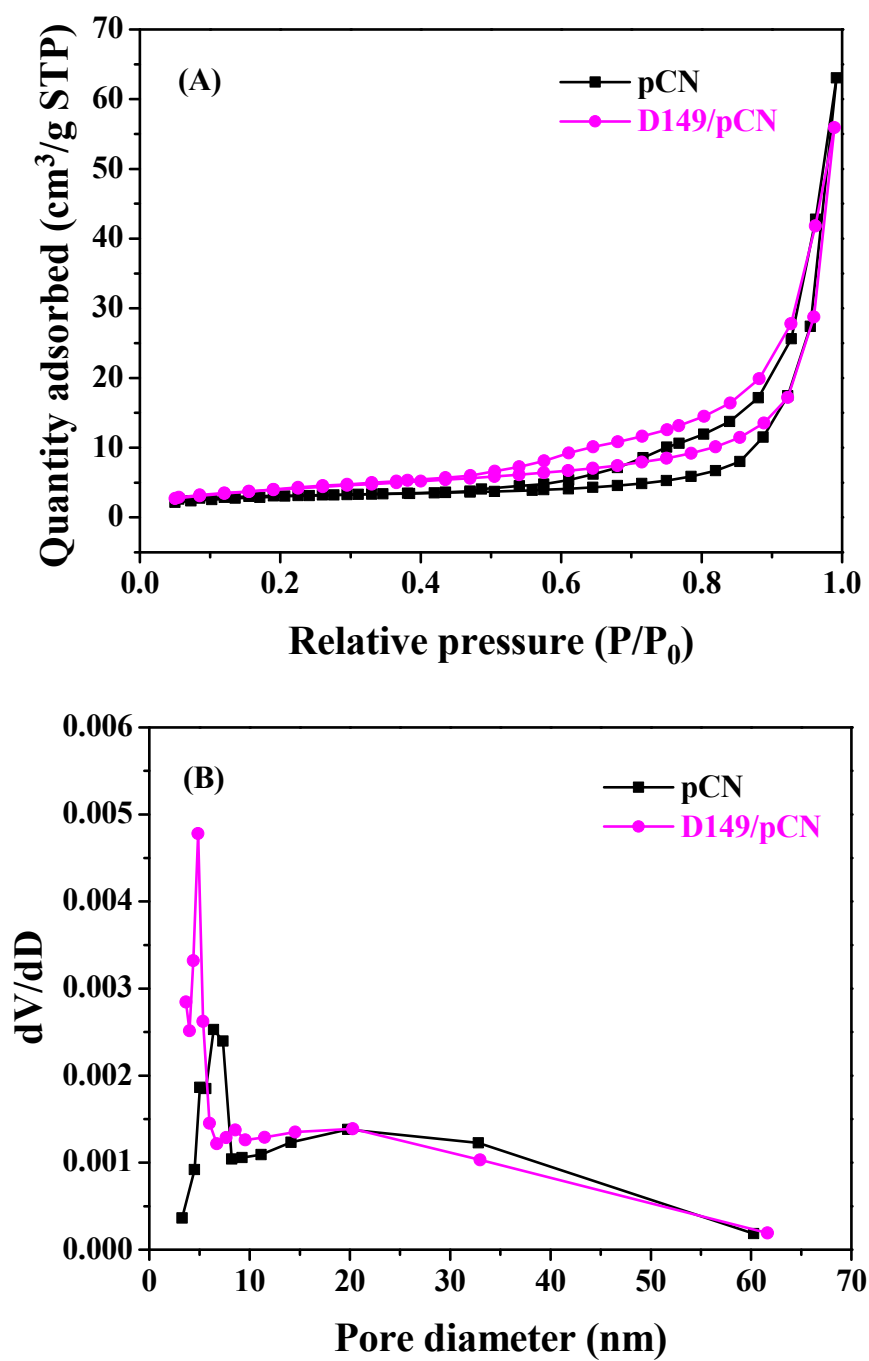

**Figure S6.** (A)  $\text{N}_2$  adsorption-desorption isotherms and (B) pore diameter distribution curves from BJH adsorption curves of pCN and D149/pCN.



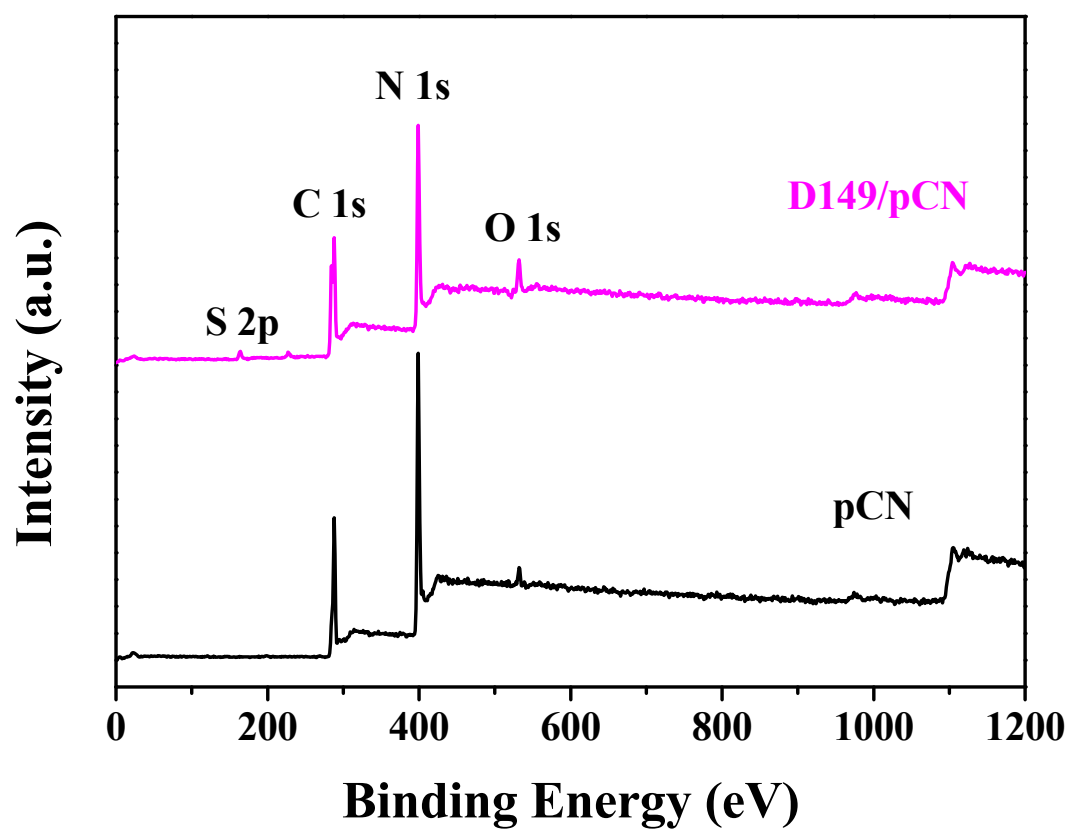

Figure S7. XPS survey spectra of pCN and D149/pCN.

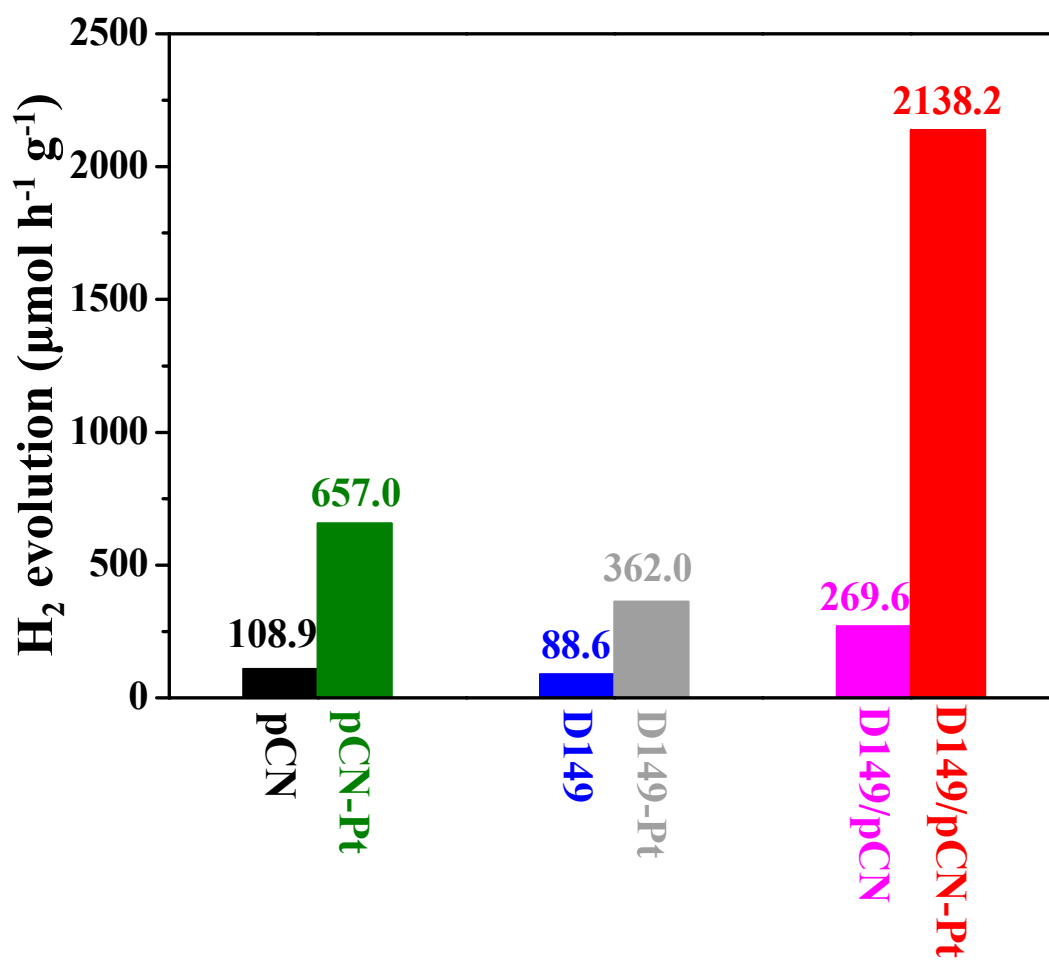

**Figure S8.** average H<sub>2</sub> evolution rates of the three samples with and without Pt in 4 h under visible light ( $\lambda > 420$  nm).

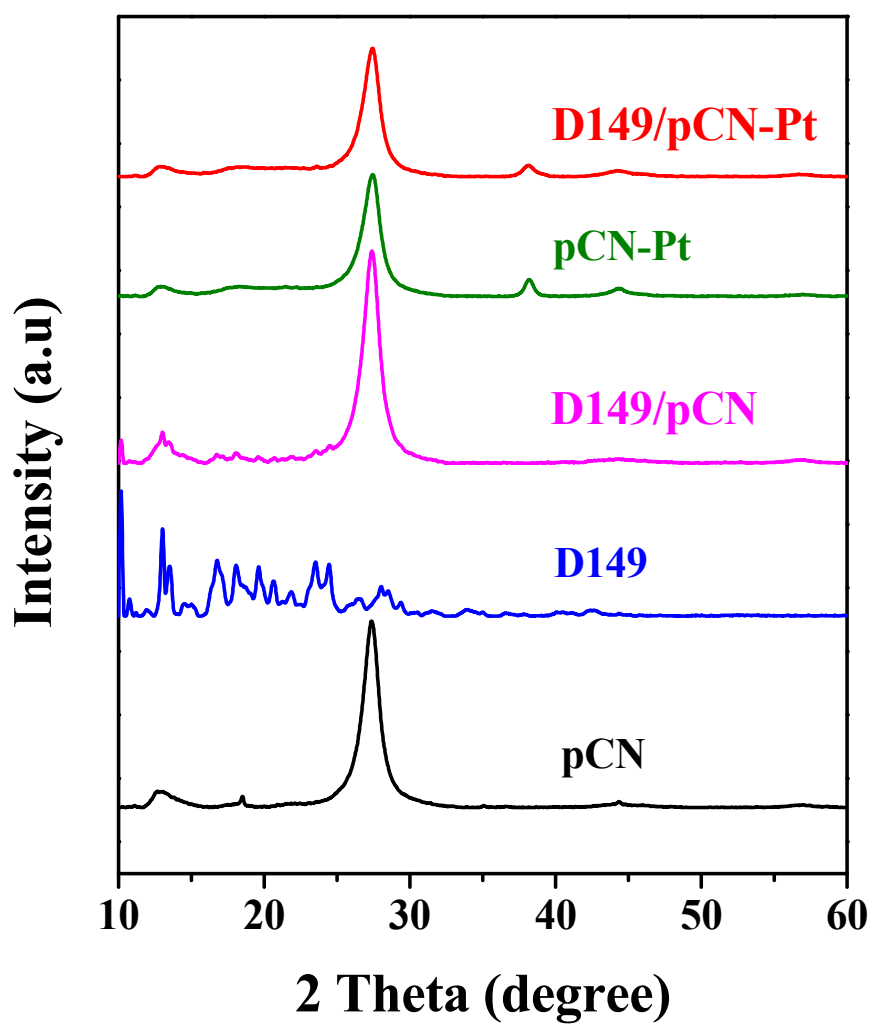

**Figure S9.** XRD patterns of pCN, D149, D149/pCN, pCN-Pt, and D149/pCN-Pt.

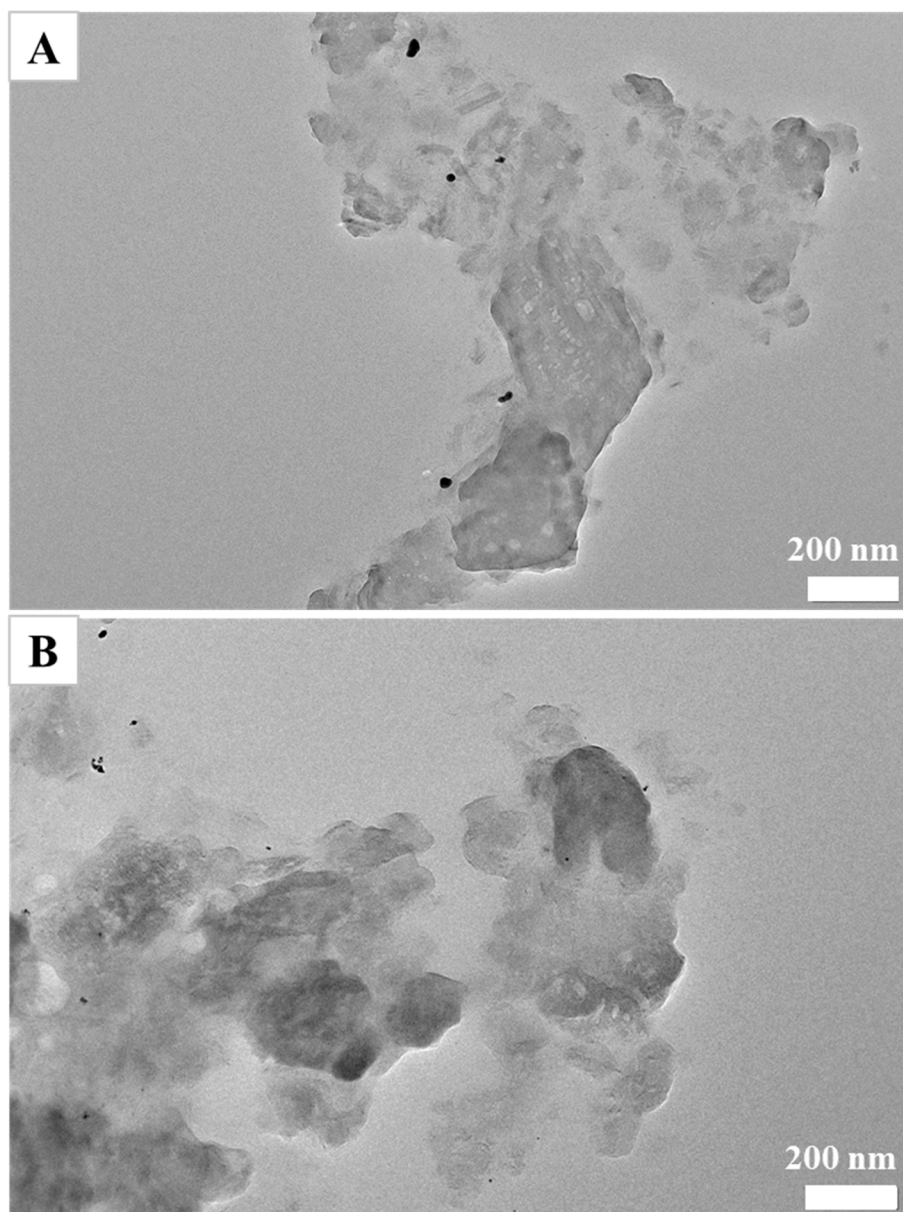

**Figure S10.** TEM images of pCN-Pt collected after reaction for one time (A) and D149/pCN-Pt collected after the recyclability test (B).

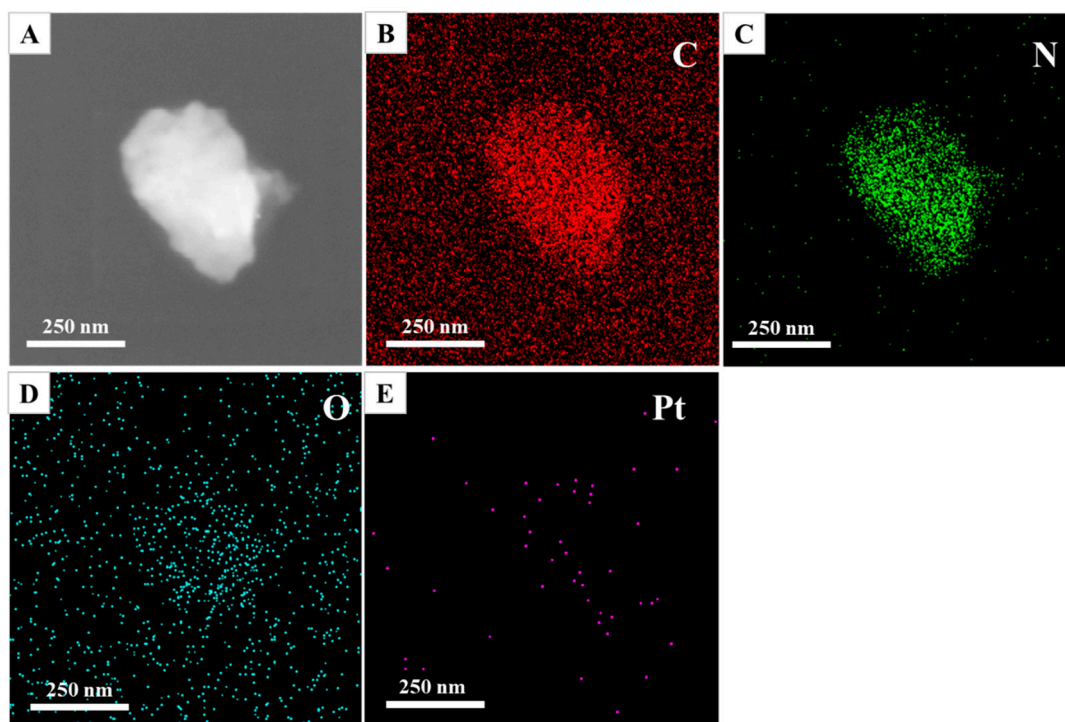

**Figure S11.** A typical STEM image of pCN-Pt collected after reaction for one time (A) and EDX mapping images of C (B), N (C), O (D), and Pt (E).

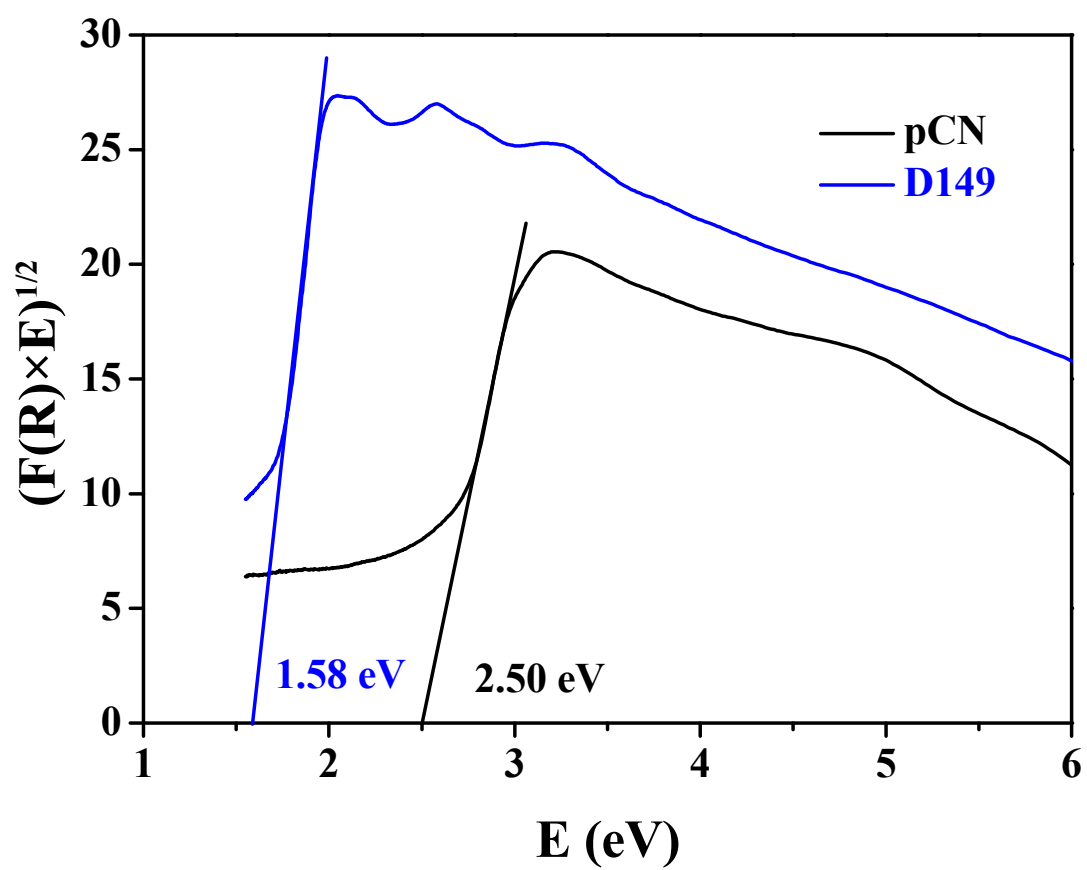

Figure S12. Band gap curves of pCN and D149.

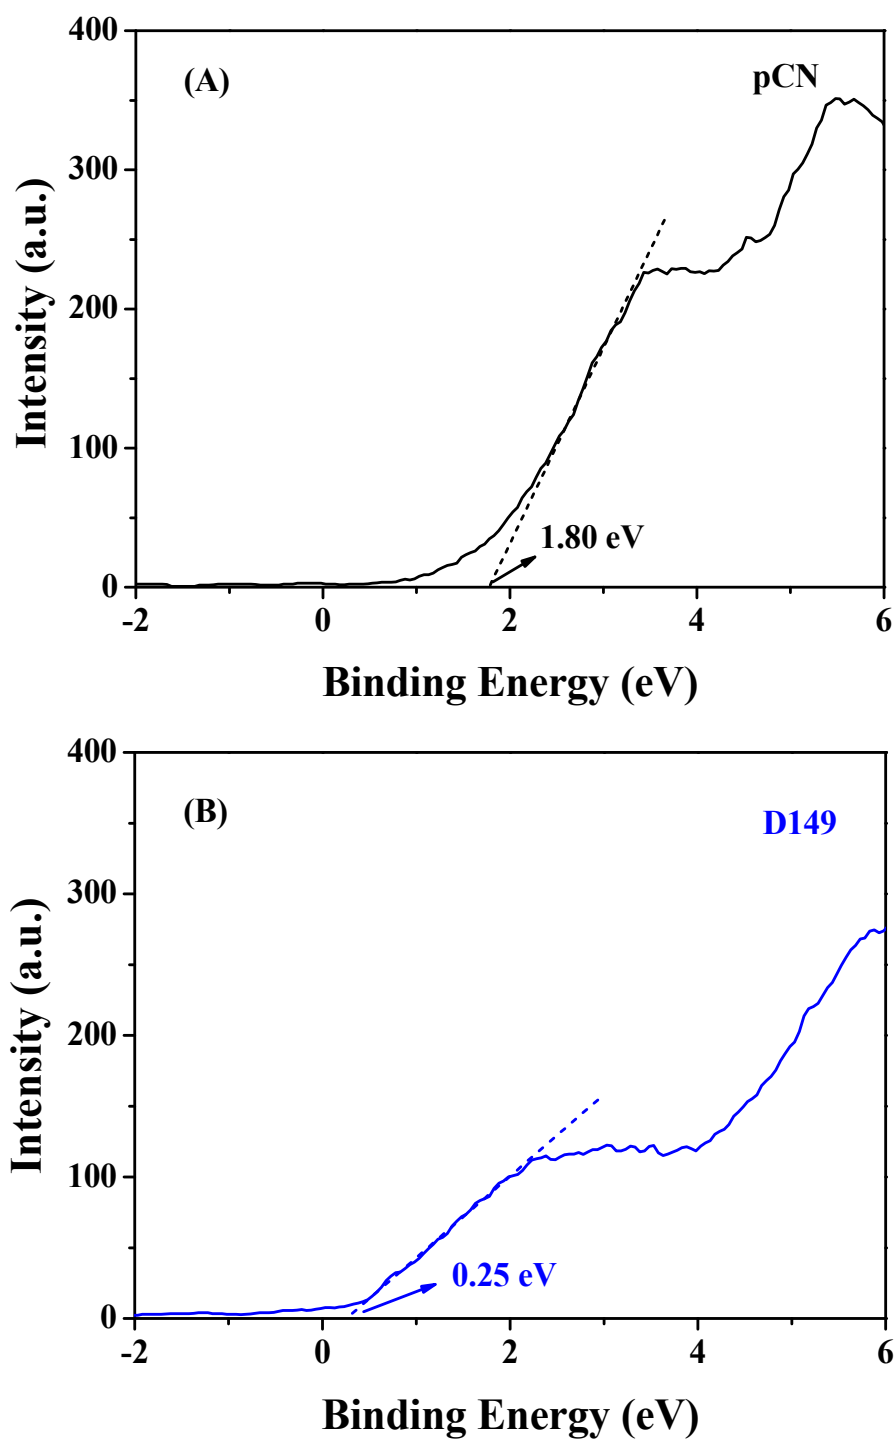

Figure S13.  $E_{VB}$  values of pCN (A) and D149 dye (B).
